# Supplementary material for: Pregnancy-associated plasma protein-A drives melanoma metastasis and immune evasion via IGF signaling
Source: Research Square preprint supplement (doi:10.21203/rs.3.rs-7513701/v1), 2025-09-23
Supplement: Supplementary file 1 [file 0e4187f37ed1a393f92279eb.docx]

**Supplementary Figures**

**Supplementary Figure S1.** Immunohistochemistry depicting the tumoral distribution of PAPPA in melanoma tissues (T1-3). Human placenta was used as a positive control. Scale bar, 100 µm.

**Supplementary Figure S2.** Flow cytometric analysis of surface PAPPA expression on parental LM-MEL-62 (red) cell line and the matched line transformed with the PAPPA-OE (blue) vector.


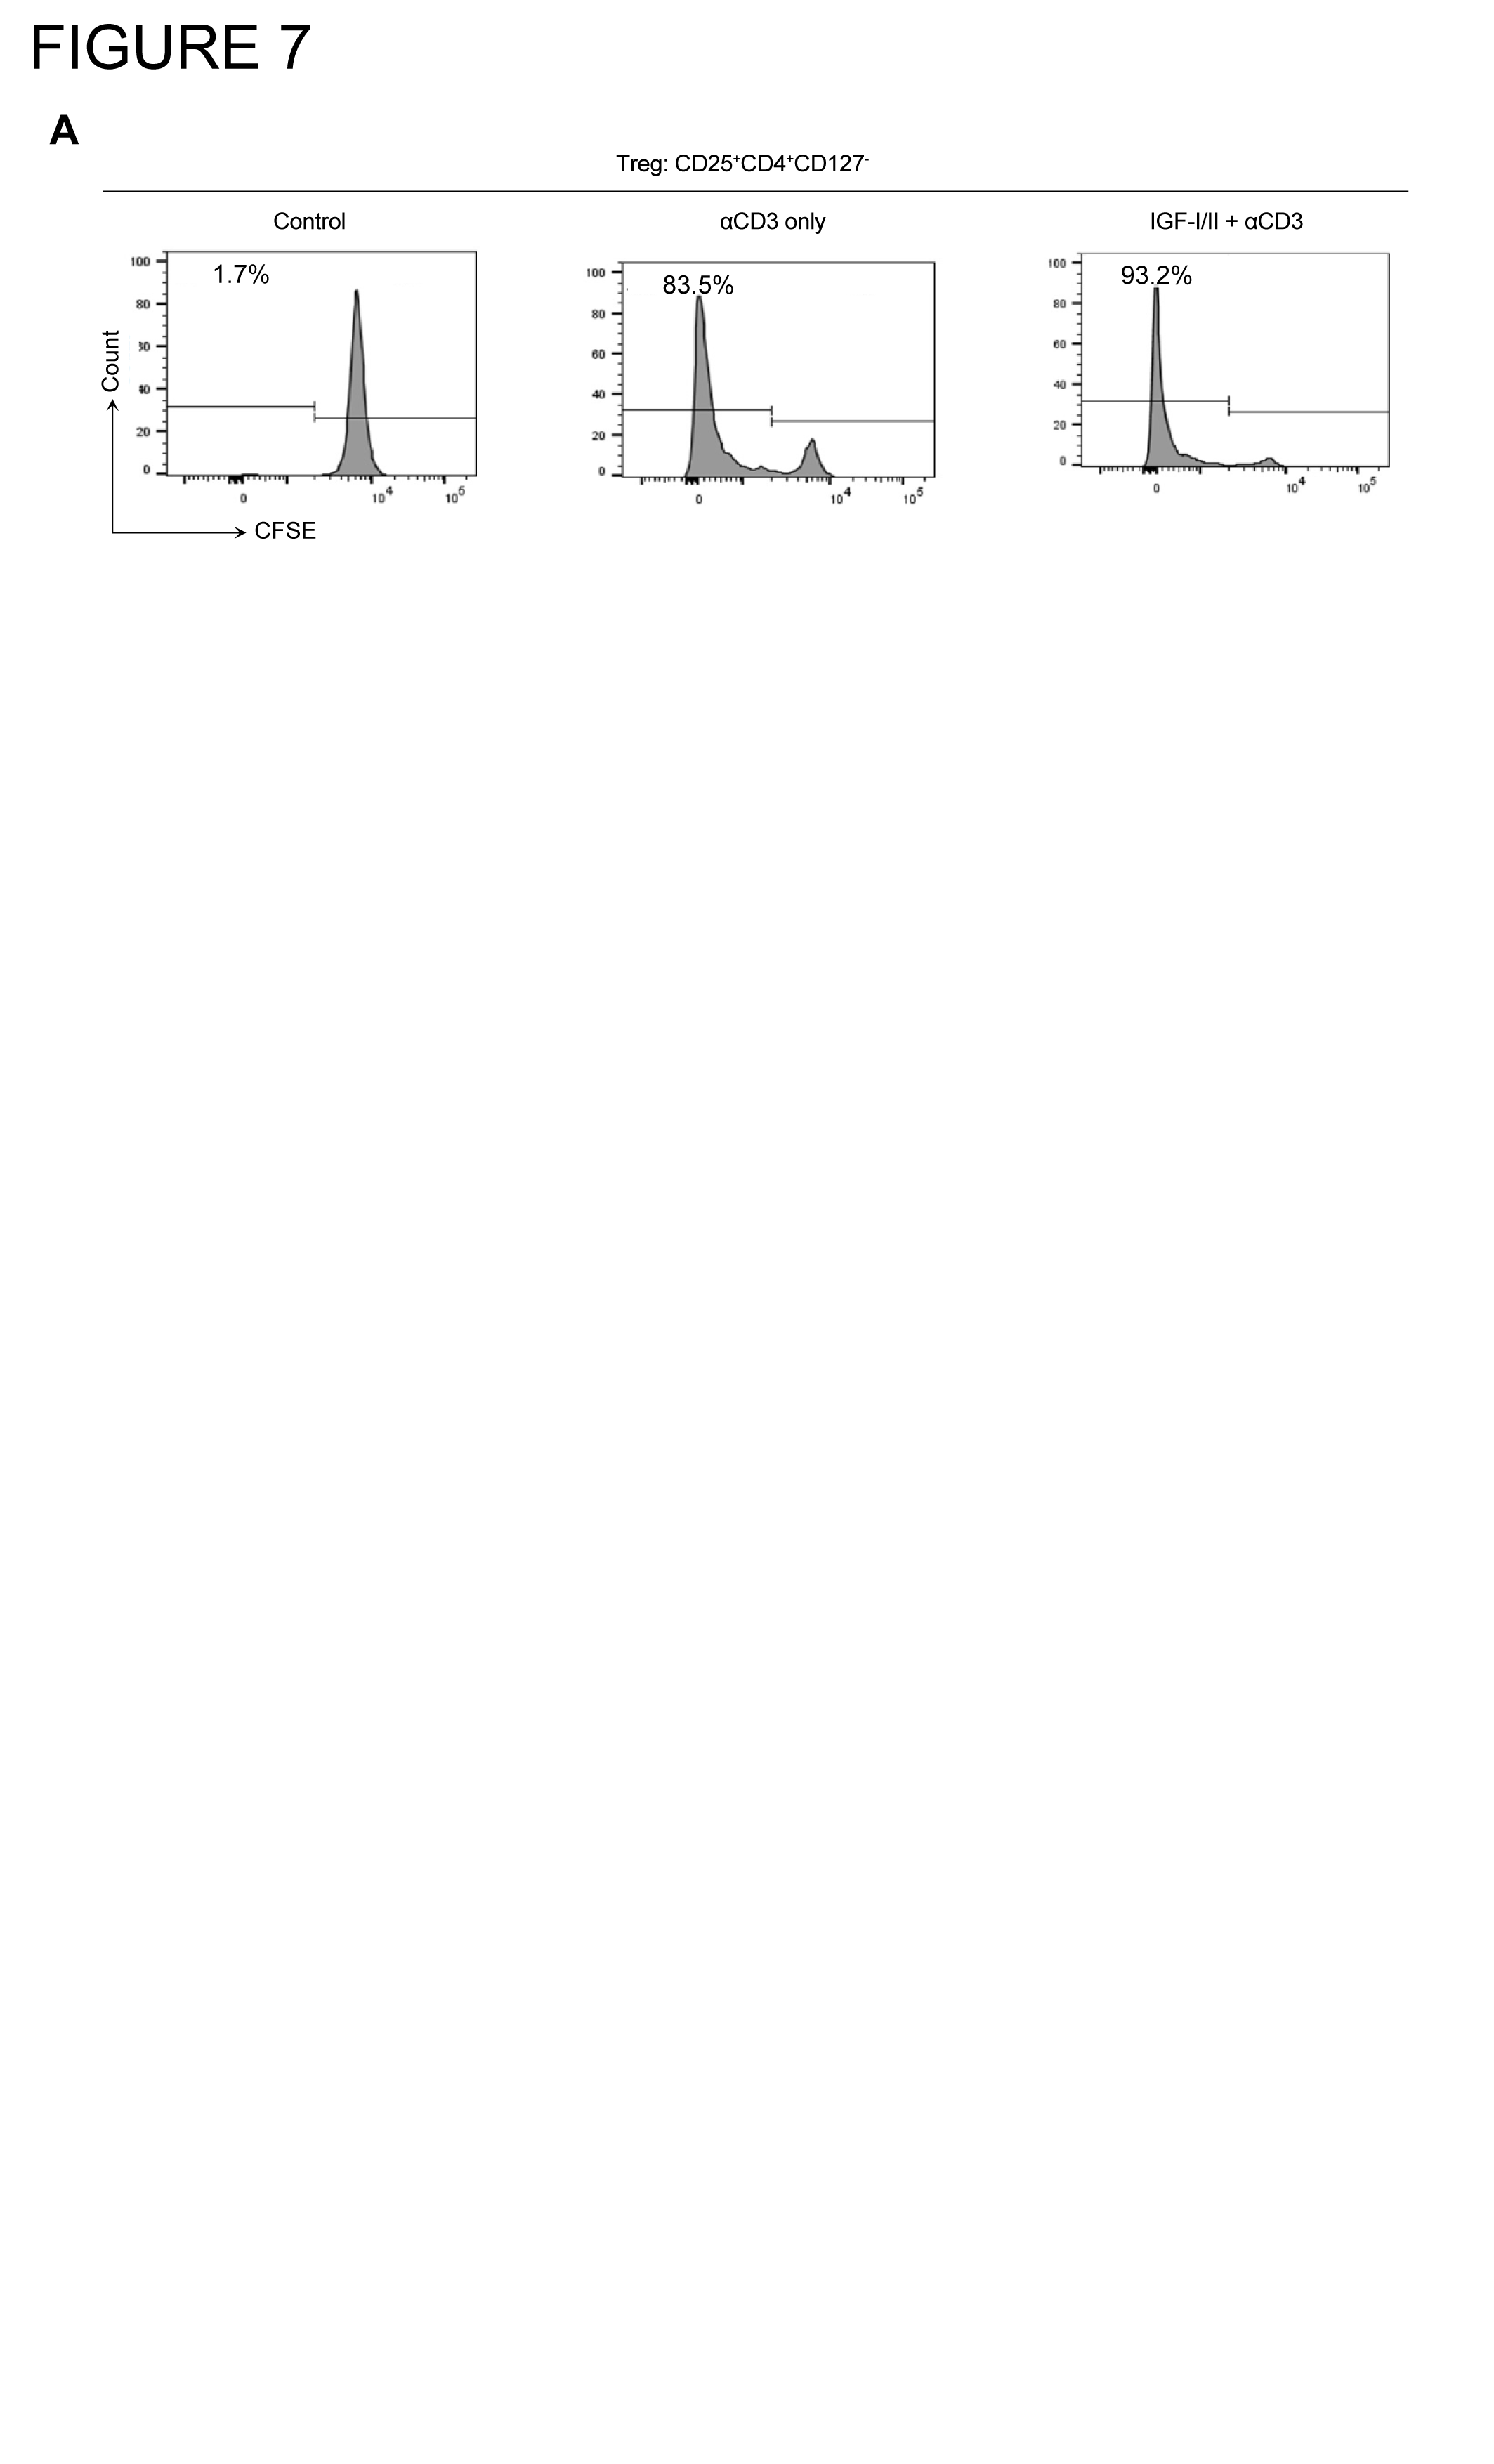


**Supplementary Figure S3.** IGF signaling stimulates expansion of Tregs. Proliferation of CFSE-labelled Treg cells (CD25+CD4+CD127- T-cells) stimulated for 3 d with anti-CD3 ± IGF-I/II, assessed by flow cytometry. CFSE intensity is inversely correlated with cell division. Results revealed that IGFR/CD3 co-activation enhanced proliferation of patient-derived Tregs compared to anti-CD3 alone.
